# Supplementary material for: Two mixed-NH3/amine platinum (II) anticancer complexes featuring a dichloroacetate moiety in the leaving group
Source: PubMed Central journal article supplement (PMC3746205; doi:10.1038/srep02464), 2013-08-19
Supplement: srep02464-s1.pdf [file srep02464-s1.pdf]

# Two mixed-NH<sub>3</sub>/amine platinum (II) anticancer complexes featuring a dichloroacetate moiety in the leaving group

Weiping Liu, Jia Su, Jing Jiang, Xingyao Li, Qingsong Ye, Hongyu Zhou, Jialin Chen, Yan Li\*

## Supplementary Information

**Figure S1.** HPLC chromatogram (the mobile phase: CH<sub>3</sub>OH/H<sub>2</sub>O (V/V) =30/70) of complex **1a** and the corresponding UV and MS-ESI<sup>+</sup> spectra of the two isomeric forms.

**Figure S2.** HPLC chromatogram (the mobile phase: CH<sub>3</sub>OH/H<sub>2</sub>O (V/V)=27/73) of complex **2a** and the corresponding UV and MS-ESI<sup>+</sup> spectra of the two isomeric forms.

**Figure S3.** IR spectra of 3-dichloroacetoxy cyclobutane-1,1-dicarboxylic acid **4**.

**Figure S4.** IR spectra of complex **1a**.

**Figure S5.** IR spectra of complex **2a**.

**Figure S6.** <sup>13</sup>C NMR spectra of 3-dichloroacetoxy cyclobutane-1,1-dicarboxylic acid.

**Figure S7A.** <sup>13</sup>C NMR spectra of complex **1a** in DMSO.

**Figure S7B.** <sup>13</sup>C NMR spectra of complex **1a** in DMSO with white background.

**Figure S8A.** <sup>13</sup>C NMR spectra of complex **2a** in DMSO.

**Figure S8B.** <sup>13</sup>C NMR spectra of complex **2a** in DMSO with white background.

**Figure S9A.** <sup>1</sup>H NMR spectra of complex **1a** in DMSO.

**Figure S9B.** <sup>1</sup>H NMR spectra of complex **1a** in DMSO with white background.

**Figure S10A.** <sup>1</sup>H NMR spectra of complex **2a** in DMSO.

**Figure S10B.** <sup>1</sup>H NMR spectra of complex **2a** in DMSO with white background.

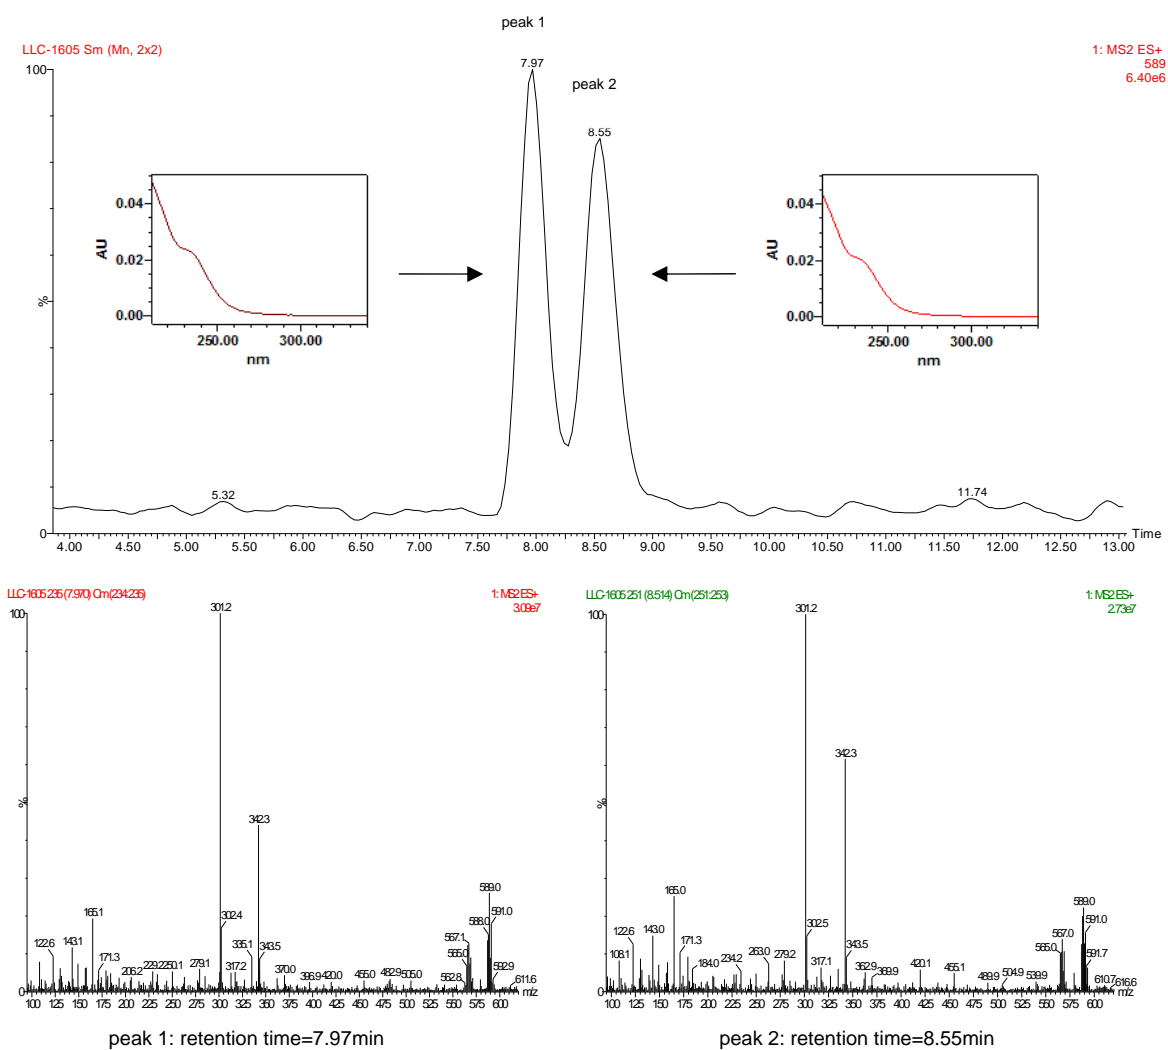

**Figure S1.** The HPLC chromatogram (the mobile phase: CH<sub>3</sub>OH/H<sub>2</sub>O (V/V) =30/70) of complex **1a** and the corresponding UV and MS-ESI<sup>+</sup> spectra of the two isomeric forms.

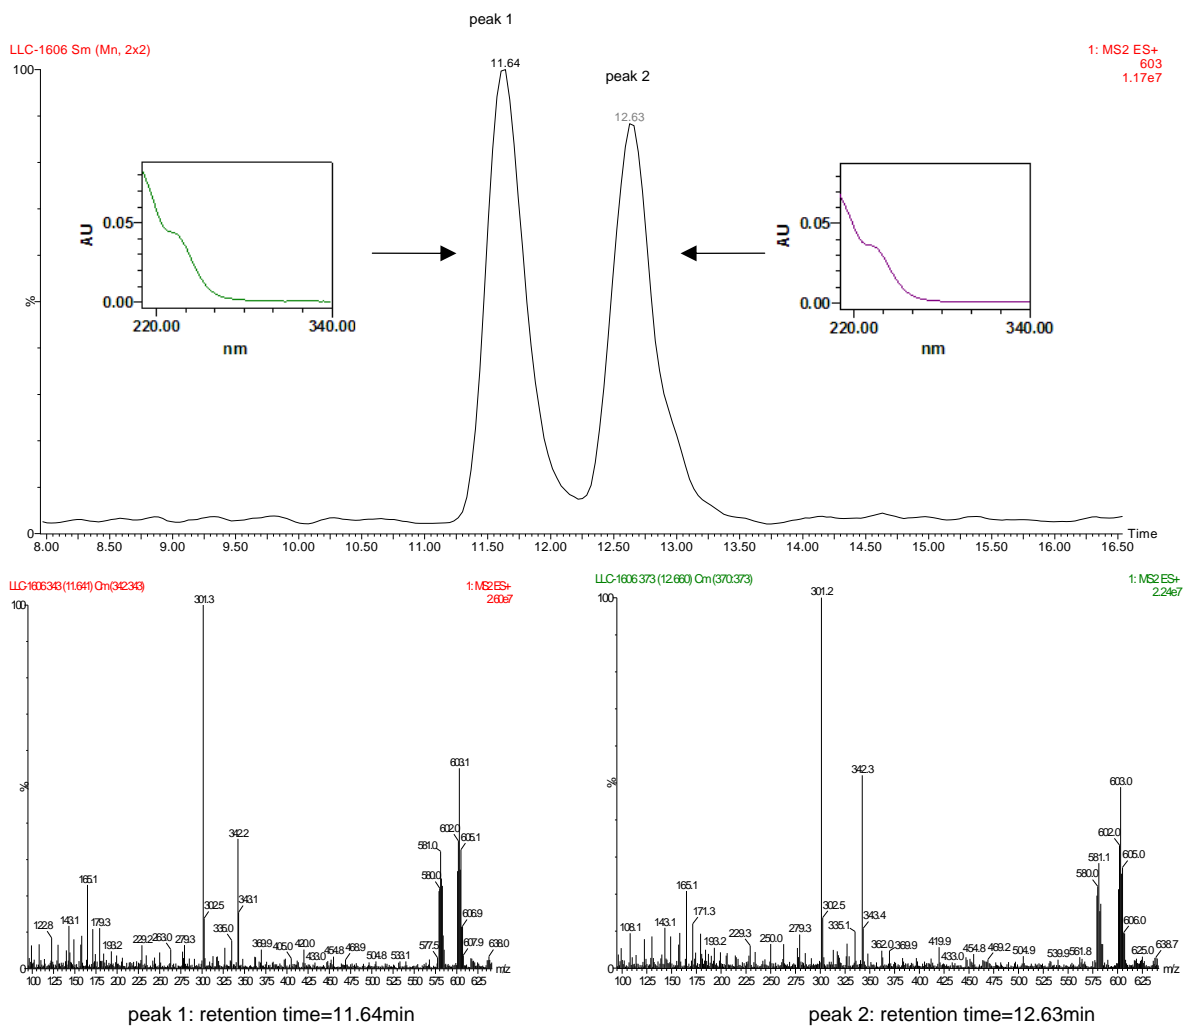

**Figure S2** The HPLC chromatogram (the mobile phase: CH<sub>3</sub>OH/H<sub>2</sub>O (V/V)=27/73) of complex **2a** and the corresponding UV and MS-ESI<sup>+</sup> spectra of the two isomeric forms.

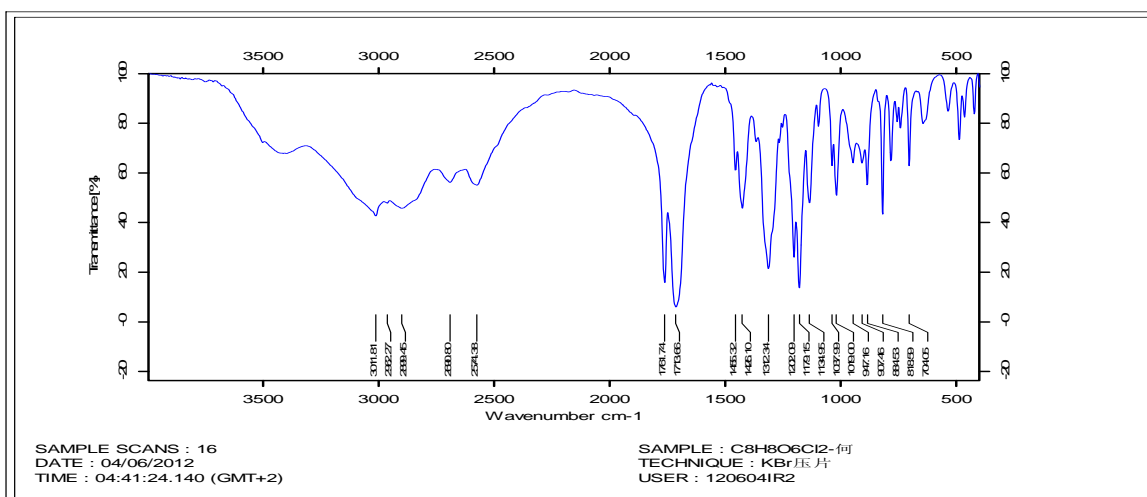

Figure S3. IR spectra of 3-dichloroacetylchlorobutane-1,1-dicarboxylic acid **4**.

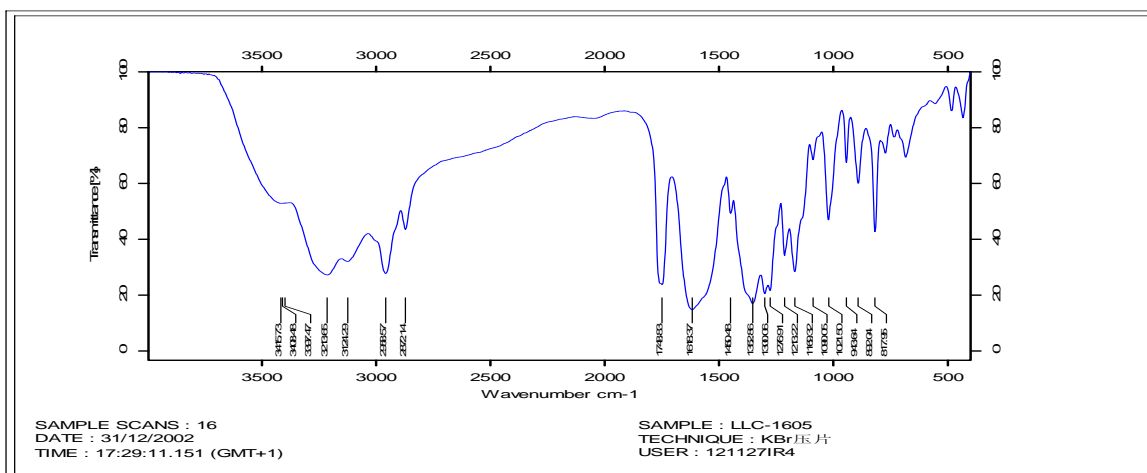

Figure S4. IR spectra of complex **1a**.

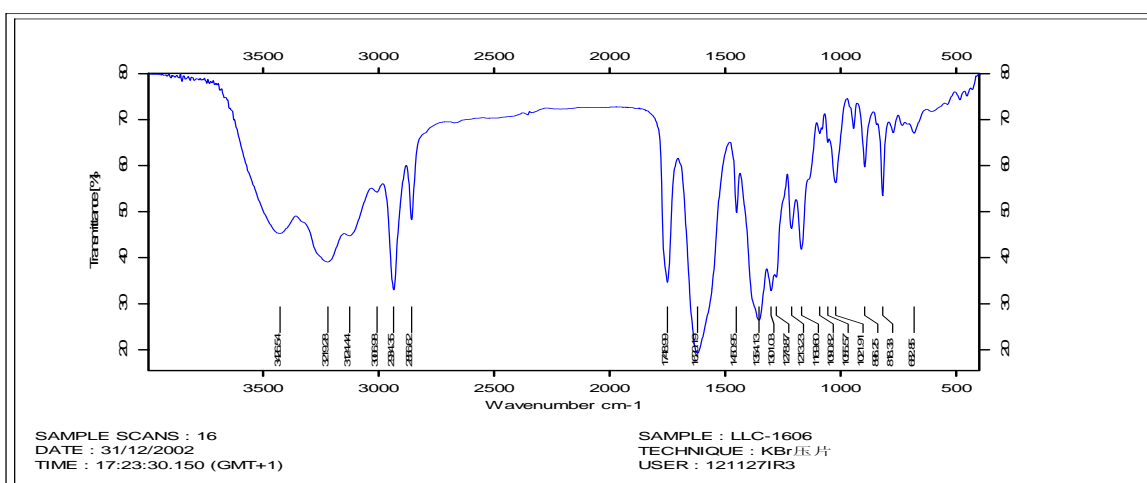

Figure S5. IR spectra of complex **2a**.

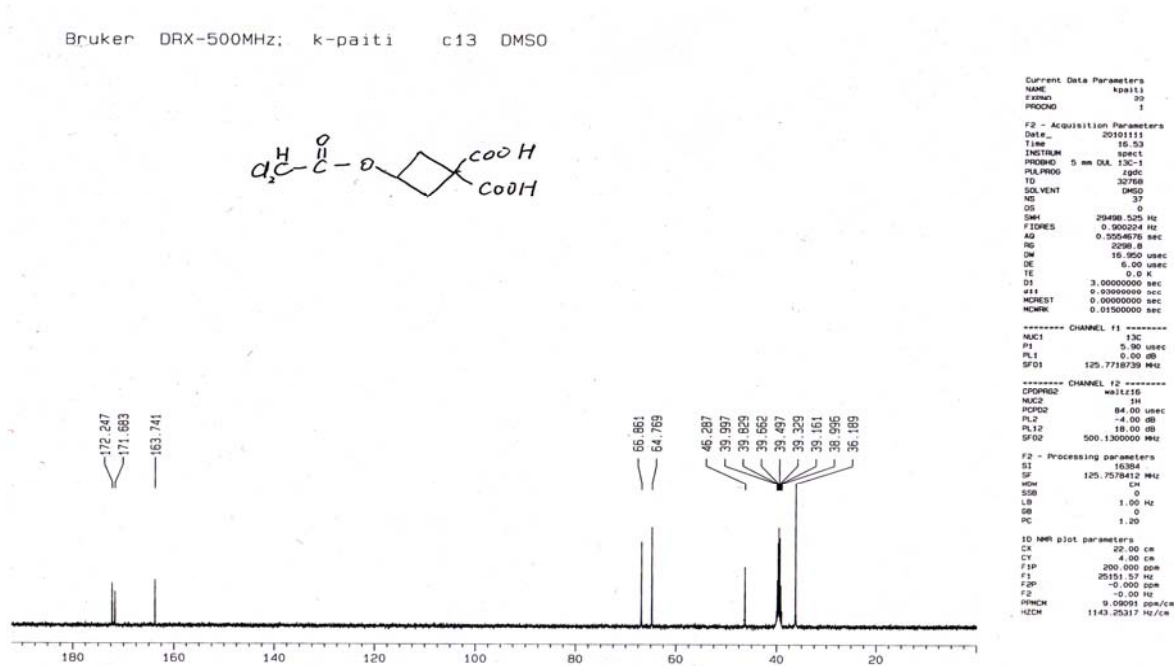

Figure S6.  $^{13}\text{C}$  NMR spectra of 3-dichloroacetyloxycyclobutane-1,1-dicarboxylic acid.

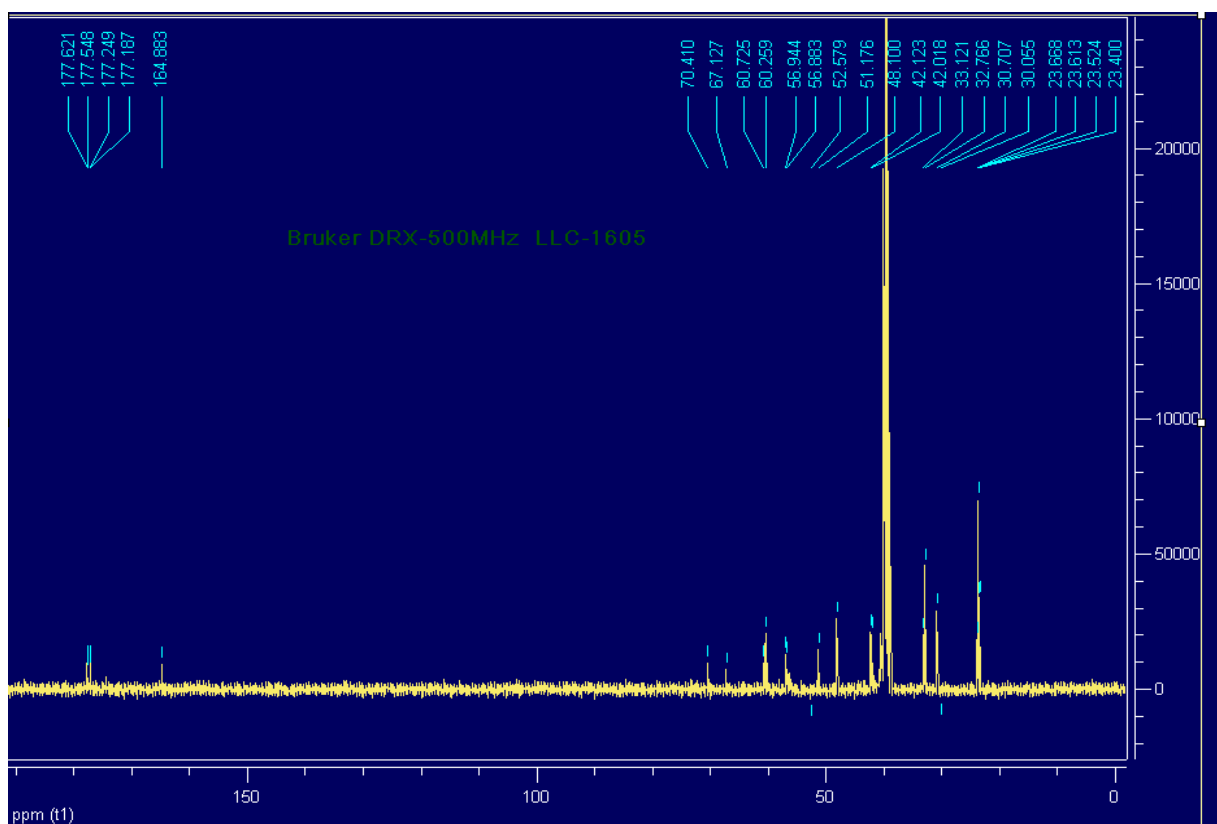

Figure S7A.  $^{13}\text{C}$  NMR spectra of complex **1a** in DMSO.



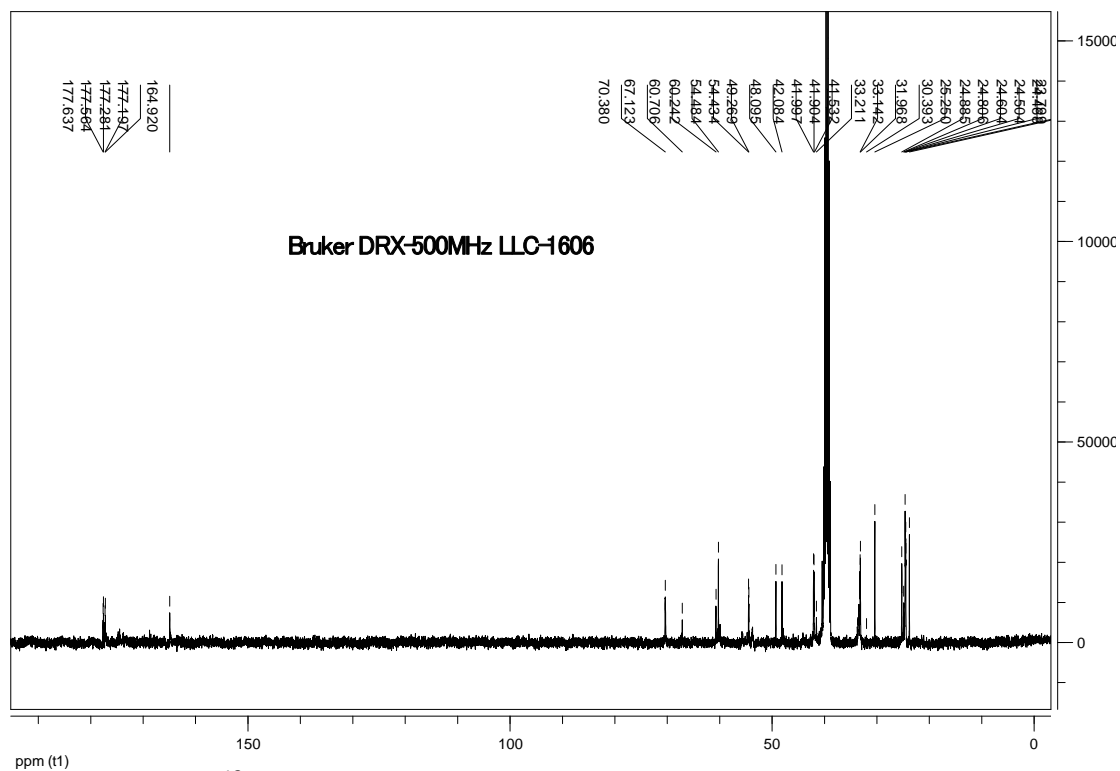

Figure S8B.  $^{13}\text{C}$  NMR spectra of complex **2a** in DMSO with white background.

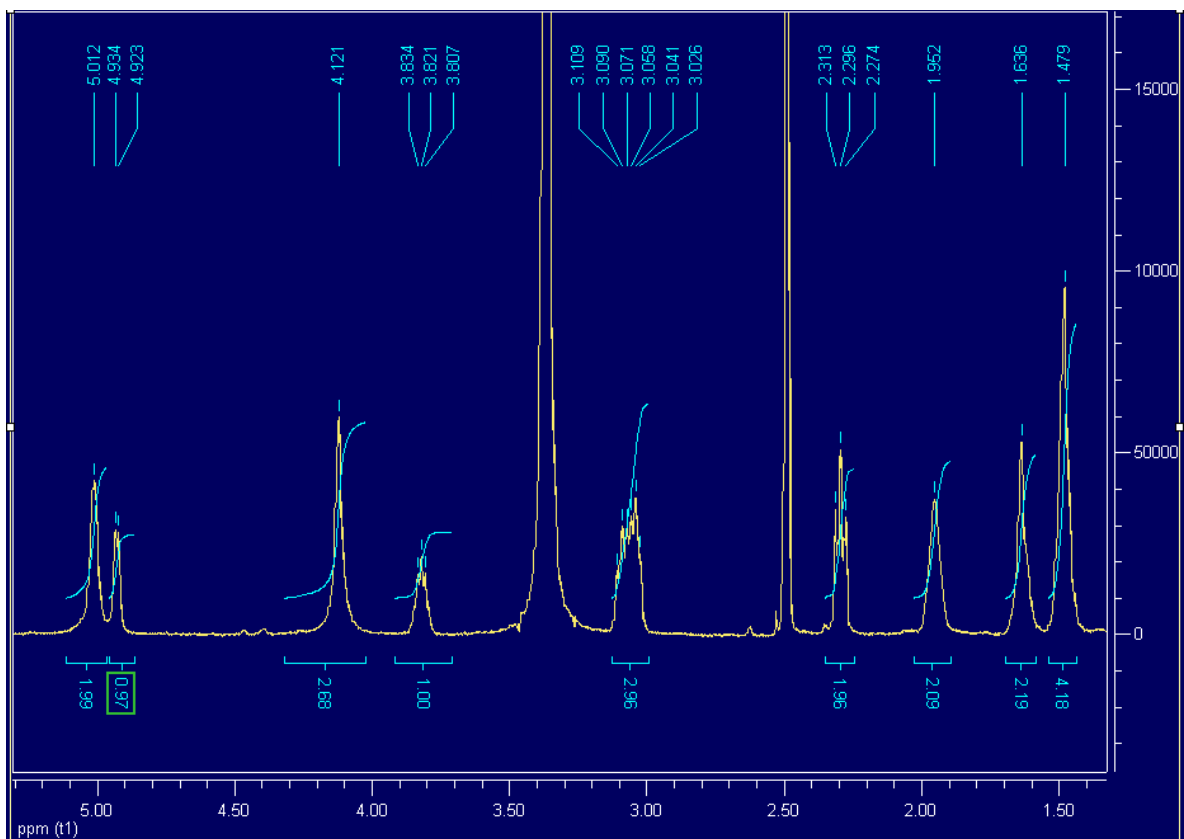

Figure S9A.  $^1\text{H}$  NMR spectra of complex **1a** in DMSO.

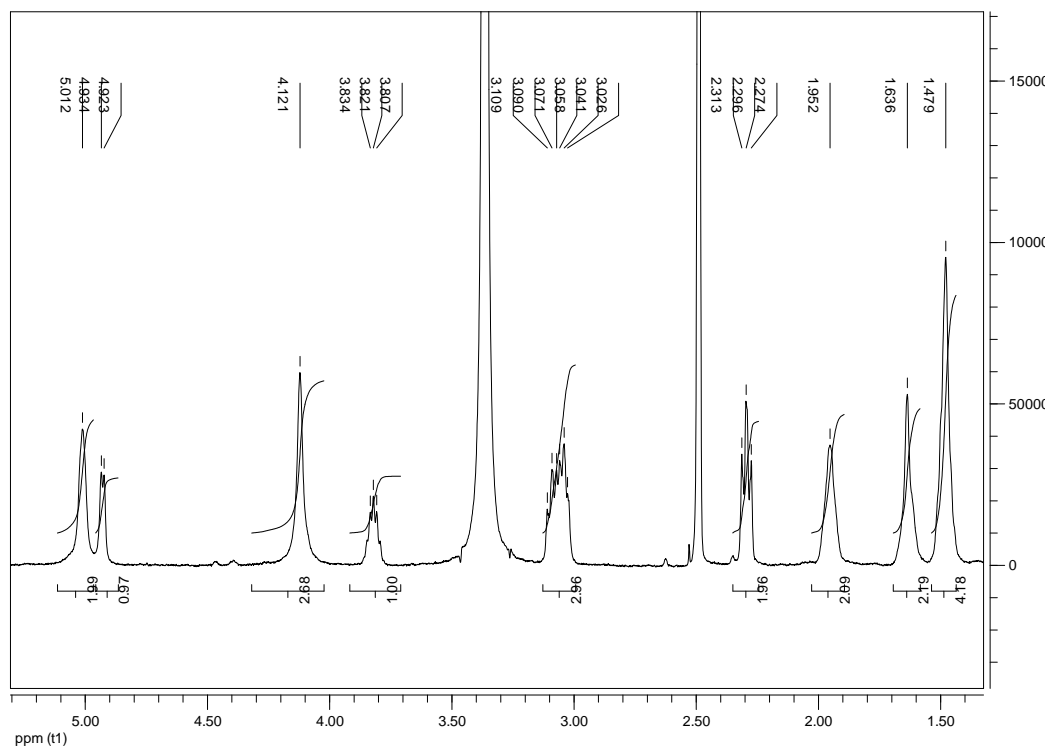

**Figure S9B.**  $^1\text{H}$  NMR spectra of complex **1a** in DMSO with white background.

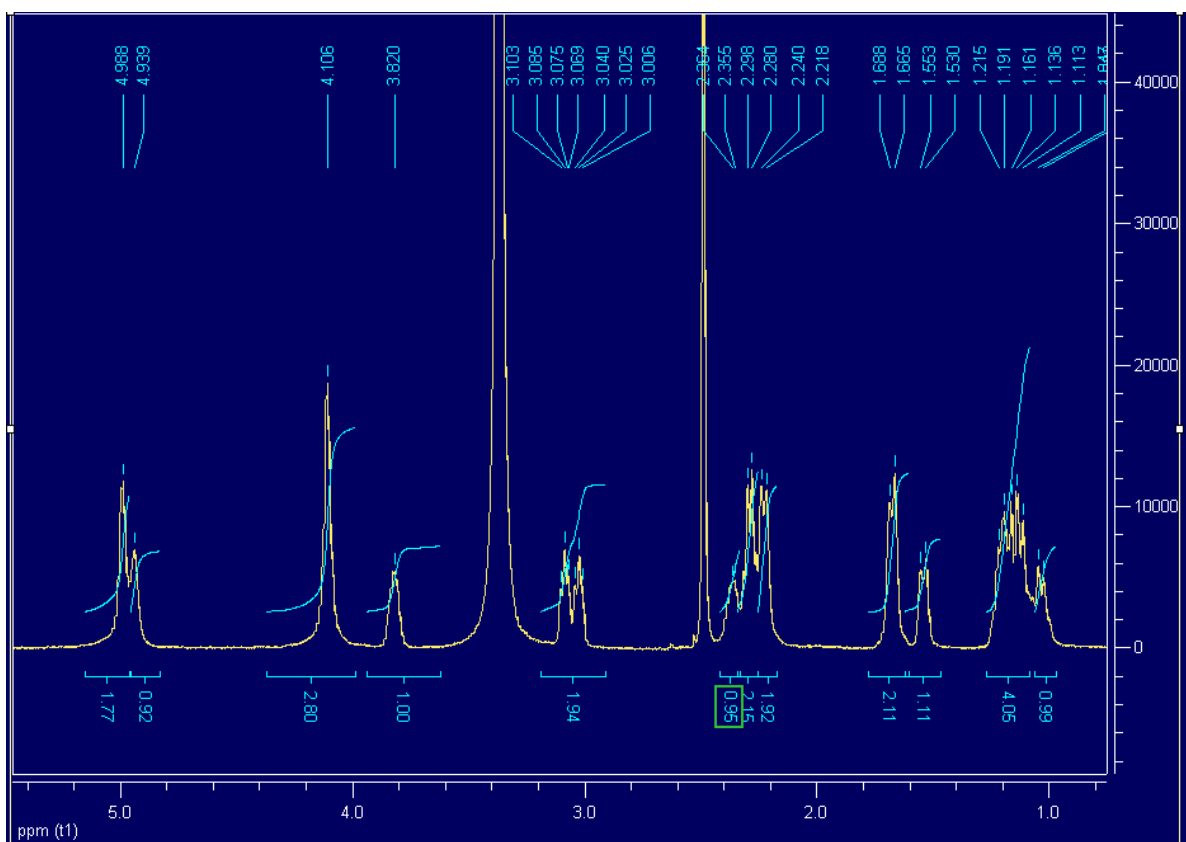

**Figure S10A.**  $^1\text{H}$  NMR spectra of complex **2a** in DMSO.



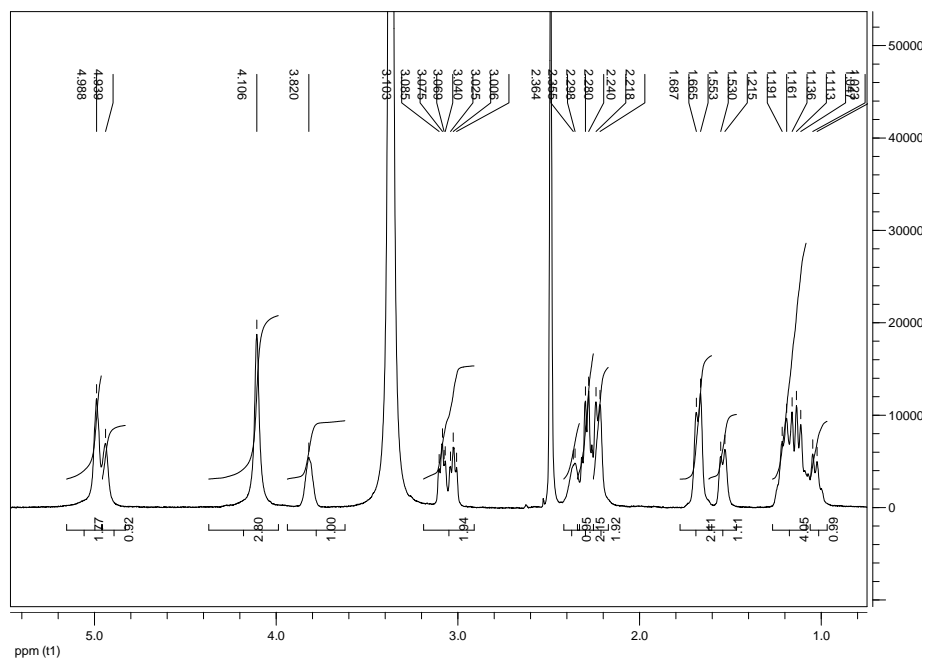

**Figure S10B.**  $^1\text{H}$  NMR spectra of complex **2a** in DMSO with white background.
